# Supplementary material
Source: Research Square preprint supplement (doi:10.21203/rs.3.rs-8834018/v1)
Supplement: Supplementary file 1 [file 2985cd404df267b21ad79246.docx]

**Supplementary Table S2.** **List of primer sequences used for gene expression**

| Gene | Primer Sequence 5’-3’ |
| --- | --- |
| *m-Col1a1* | F:CCAAGAAGACATCCCTGAAGTCA |
|  | R:TGCACGTCATCGCACACA |
| *m-Fn1* | F:TCTGGGAAATGGAAAAGGGGAATGG |
|  | R:CACTGAAGCAGGTTTCCTCGGTTGT |
| *m-Mpc1* | F:GTGCGGAAAGCGGCGGACTA |
|  | R:GGCAGCAATGGGAAGACCCCA |
| *m-Ldha* | F:TTAAGGAAGAGCAGGCTCCC |
|  | R:TGGAGATCCATCATCTCGCC |
| *m-Actb* | F:GATGCTCCCCGGGCTGTATT |
|  | R:GGGGTACTTCAGGGTCAGGA |
| *m-Gapdh* | F:TGACCTCAACTACATGGTCTACA |
|  | R:CTTCCCATTCTCGGCCTTG |
