# Supplementary material
Source: Research Square preprint supplement (doi:10.21203/rs.3.rs-8834018/v1)
Supplement: Supplementary file 2 [file 5e81fd91476a8ce63c0c9ec4.docx]

**Supplementary Table S1.**

| REAGENT or RESOURCE | SOURCE | IDENTIFIER |
| --- | --- | --- |
| Fixable Viability Stain 510 | BD Biosciences | Cat# 564406 |
| Fixable Viability Stain 780 | BD Biosciences | Cat# 565388 |
| Anti-mouse CD45 APC-Cy7(30-F11) | BD Biosciences | Cat# 557659 |
| Anti-mouse CD45 PerCP-CyTM5.5(30-F11) | BD Biosciences | Cat# 550994 |
| Anti-mouse CD64 BV421 (X54-5/7.1) | Biolegend | Cat# 139309 |
| Anti-mouse CD11b APC (M1/70) | BD Biosciences | Cat# 553312 |
| Anti-mouse CD11b BV650 (M1/70) | BD Biosciences | Cat# 563402 |
| Anti-mouse CD11b PerCP-CyTM5.5 (M1/70) | BD Biosciences | Cat# 550993 |
| Anti-mouse CD11b FITC (M1/70) | BD Biosciences | Cat# 557396 |
| Anti-mouse Ly6G BV786 (1A8) | BD Biosciences | Cat# 740953 |
| Anti-mouse CD172a RB705 (P84) | BD Biosciences | Cat# 757597 |
| Anti-mouse CD115 BV421 (CSF-1R) | BD Biosciences | Cat# 750895 |
| Anti-mouse Ly6C PE (HK1.4) | eBioscience | Cat# 12-5932-82 |
| Anti-mouse Ly6C PE-CF594  (HK1.4.rMAb) | BD Biosciences | Cat# 570053 |
| Anti-mouse Siglec F BB515 (E50-2440) | BD Biosciences | Cat# 564514 |
| Anti-mouse Siglec F PE-Cyanine7  (1RNM44N) | eBioscience | Cat# 25-1702-82 |
| Anti-mouse Arg1 APC(A1exF5) | eBioscience | Cat# 17-3697-82 |
| Rabbit Anti-MPC1 | Cell Signaling Technology | Cat# 14462 |
| Rabbit Anti-LDHa | Cell Signaling Technology | Cat# 3582 |
| Rabbit Anti-LDHa | Cell Signaling Technology | Cat# 2012 |
| Rabbit Anti-ARG1 | Cell Signaling Technology | Cat# 93668 |
| Rabbit Anti-Tubulin | Cell Signaling Technology | Cat# 2144 |
| Rabbit Anti-COL1A1 | Abconol | Cat# A1352 |
| Rabbit Anti-FN1 | Sigma | Cat# F3648 |
| Rabbit Anti-H3K18la | PTM BIO | Cat#PTM-1427RM |
| Rabbit Anti-IgG | Proteintech | Cat# 30000-0-AP |
| Rabbit Anti-L-Lactyl Lysine | PTM BIO | Cat# PTM-1401 |
| Rabbit Anti-CD66b | STARTER | Cat# S0B0521 |
| DMEM | Gibco | Cat# 11995 |
| Recombinant Murine M-CSF | PeproTech | Cat# 315–02 |
| Heat-Inactivated fetal bovine serum | Gibco | Cat# 10100147 |
| Penicillin–streptomycin | Gibco | Cat# 15140122 |
| Lipopolysaccharides from Escherichia coli O111:B4 | Sigma-Aldrich | Cat# L4391 |
| PBS | Gibco | Cat# 10010023 |
| Red Blood Cell Lysis Buffer | BioLegend | Cat# 420301 |
| Bovine Serum Albumin | Sigma | Cat# 9048-46-8 |
| Ficoll-PaqueTM Plus | Cytiva | Cat# 17144002 |
| Bleomycin | Selleck Chemicals | Cat# S1214 |
| Arg1 inhibitor Numidargistat dihydrochloride (CB1158 ) | MedChemExpress | Cat# HY-101979A |
| Tamoxifen | Sigma | Cat# T5648-1G |
| Lung Dissociation Kit | Miltenyi Biotec | Cat# 130-095-927 |
| Fixation/permeabilization solution | BD Biosciences | Cat# 51-2090KZ |
| Perm/wash buffer | BD Biosciences | Cat# 51-2091KZ |
| RIPA buffer | Cell Signaling Technology | Cat# 9806 |
| Protease inhibitor cocktail | Roche | Cat# 11873580001 |
| Phosphatase inhibitor cocktail | Roche | Cat# 04906845001 |
| Pierce BCA protein assay Kit | Thermo Fisher Scientific | Cat# 23225 |
| Sodium dodecyl sulfate | Sigma | Cat# 151-21-3 |
| TRIzol Reagent | Invitrogen | Cat# 15596018 |
| RNeasy Plus Mini kit | Qiagen | Cat# 74134 |
| RevertAid First Strand cDNA Synthesis Kit | Thermo Fisher Scientific | Cat# 00986855 |
| PowerUp SYBR Green Master Mix | Thermo Fisher Scientific | Cat# 2664573 |
| D-GLUCOSE U-13C6 | Cambridge Isotope Laboratories | Cat# CLM-1396 |
| protein A/G magnetic beads | MedChemExpress | Cat# HY-K0202 |
| 10% Chelex 100 sodium solution | Solarbio | Cat# C8230 |
| MACS Tissue Storage Solution | Miltenyi Biotec | Cat# 130-100-008 |
| Neutral protease | Worthington | Cat# LS02111 |
| DNase I | Roche | Cat# 10104159001 |
| Collagenase type I | GIBCO | Cat# 17100-017 |
| Elastase | Worthington | Cat# LS002294 |
| Red Blood Cell Lysis Buffer | Miltenyi Biotec | Cat# 130-094-183 |
